# Supplementary material for: A functional nucleic acid-based fluorescence sensing platform based on DNA supersandwich nanowires and cation exchange reaction
Source: Royal Society of Chemistry journal article supplement (doi:10.1039/d3an01122d), 2023-01-01
Supplement: d3an01122d1.pdf [file d3an01122d1.pdf]

# Functional nucleic acid-based fluorescence sensing platform based on DNA supersandwich nanowires and cation exchange reaction

Fu-Peng Wang, Yan Guan, Jia-Wen Liu, Huan Chen, Rong Hu\*

*College of Chemistry and Chemical Engineering, Yunnan Normal University, Kunming · 650500, P. R. China.*

Corresponding author: Rong Hu

E-mail: hudierong\_168@163.com

Tel: +86-871-65149087

## Supplementary figures

### Materials

Bovine serum protein (BSA), 1-ethyl (3-dimethylaminopropyl) carbodiimide hydrochloride (EDC), N-hydroxysuccinimide (NHS), zinc acetate  $(\text{CH}_3\text{COO})_2\text{Zn}$ , thiourea ( $\text{CH}_4\text{N}_2\text{S}$ ), 4-(N-maleimidemethyl) cyclohexane-1-carboxylic acid sulfonic acid succinimidyl ester sodium salt (Sulfo-SMCC), treptavidin (SA),  $\beta$ -mercaptoethanol (MCH) were purchased from Sigma Inc. (USA). Silver nitrate ( $\text{AgNO}_3$ ) and polyvinylpyrrolidone (PVP) were purchased from McLean Reagent Co., Ltd. (Shanghai, China). Sterilized water ( $18.2 \text{ M}\Omega \cdot \text{cm}^{-1}$ ) was used in the experiment. All DNA strands used in the system were purchased from Shenggong BioEngineering Shanghai Co., Ltd. (Shanghai, China), and its sequence is shown in Table S1.

### Apparatus

X-ray powder diffraction (XRD) patterns were acquired by an X-Ray diffractometer D8 ADVANCE (BRUKER, Germany). The morphology of ZnS NCs was obtained by transmission electron microscope (TEM, FEI Tolas F200x, America). Atomic force microscopy (AFM) image was acquired by an atomic force microscopy (BRUKER, Germany). All of the data was measured by a fluorescence spectrophotometer (F-7100) in the wavelength range of 505 nm-600 nm, set the excitation and emission slit width of 5 nm, under the operating voltage and excitation wavelength of 750V and 494 nm.

**Table S1** The DNA sequences used in experiment

| sequence                       | from 5' to 3'                                                              |
|--------------------------------|----------------------------------------------------------------------------|
| cp DNA                         | CGCACCTCAATTTTT-SH                                                         |
| bridge DNA                     | TAGACTGTCTTAGCTCTTCGAAACATGCATGGCACAAACATTTTTG<br>CGGACACGCGGACACGCGGACAC  |
| s-DNA                          | GTGTCCGCTTTTTTTT-biotin                                                    |
| auxiliary DNA                  | AGCTAAGACAGTCTAATGCATGTTTCGAAG                                             |
| p53 DNA                        | TTGAGGTGCGTGTGTTGTGCC                                                      |
| catalytic molecular<br>beacons | FAM-<br>CCACCACAATGTTATACAGGTACTAT/rA/GGAAGTTGAGTTACGAG<br>GCGGTGGTGG-BHQ1 |
| DNAzyme                        | CTCAACTTCTCCGAGCCGGTCGAAATAGTACCT                                          |
| P1                             | TTGAGGTGCG <u>A</u> GTTTGTGCC                                              |
| P2                             | <u>G</u> TGAGGTGCGTGTGTTGTGCC                                              |
| P3                             | TTGAGGTGCGTGTGTTGTGC <u>G</u>                                              |
| P4                             | TTGAGGTGCT <u>A</u> GTTTGTGCC                                              |
| P5                             | <u>G</u> CGAGGTGCGTGTGTTGTGCC                                              |
| P6                             | TTGAGGTGCT <u>A</u> ATTGTTGTGCC                                            |

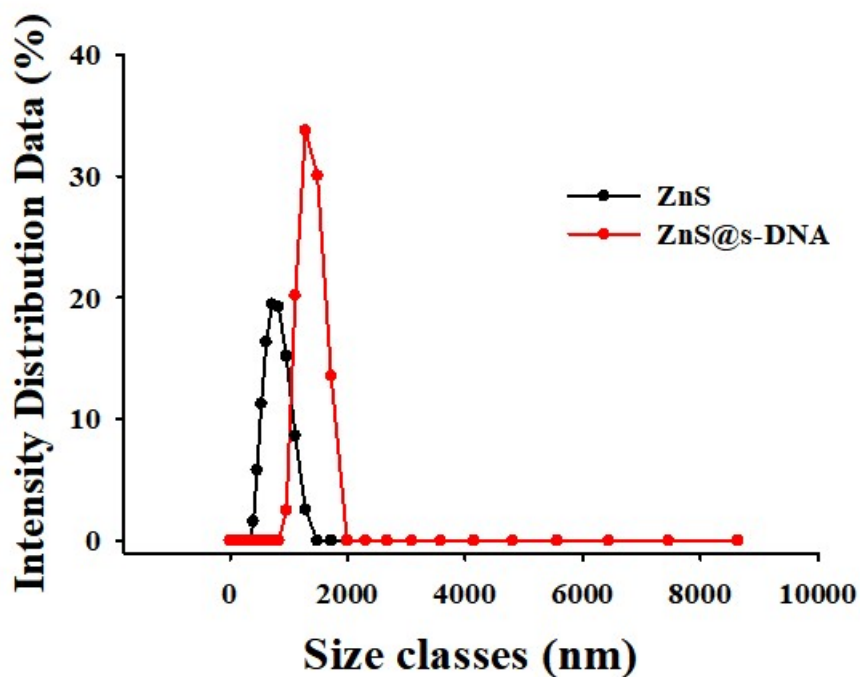

**Fig.S1** Particle size of ZnS and ZnS@s-DNA
